# Supplementary material
Source: ML conference proceedings conference paper supplement (https://openreview.net/forum?id=pyu3XK-v4zW)

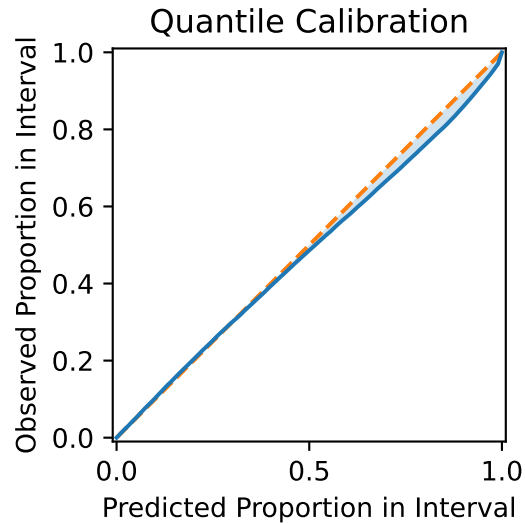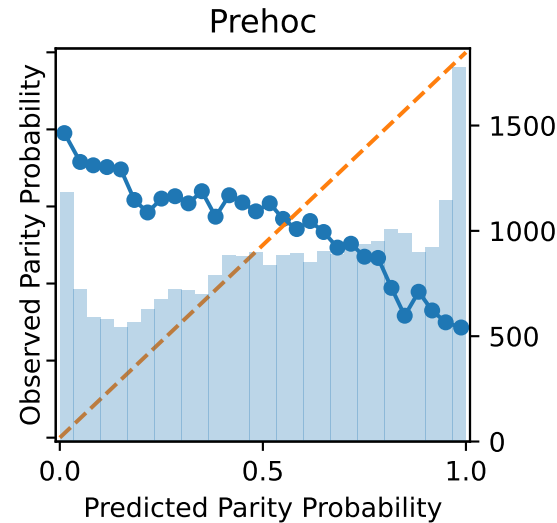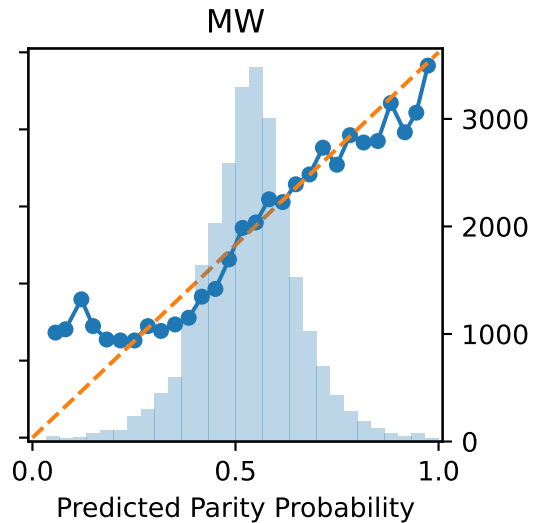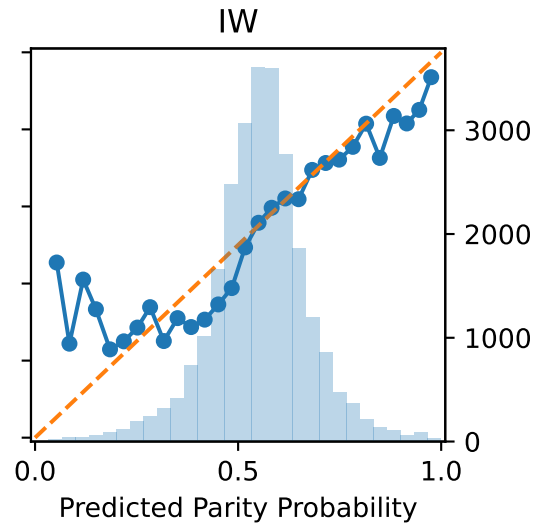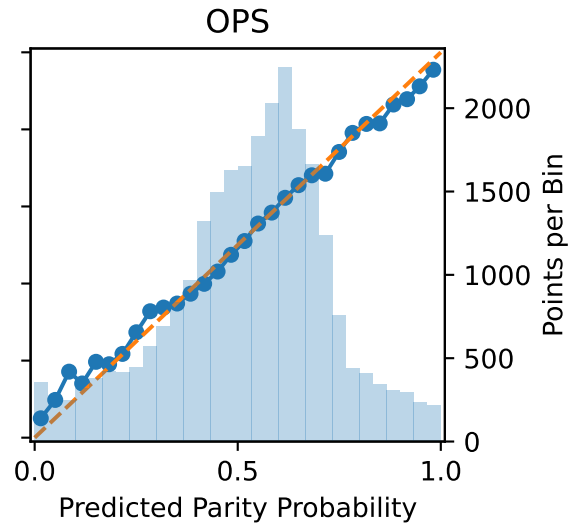

Supplement: supplementary_material [file attachment]

# COVID-19 Cases in the US

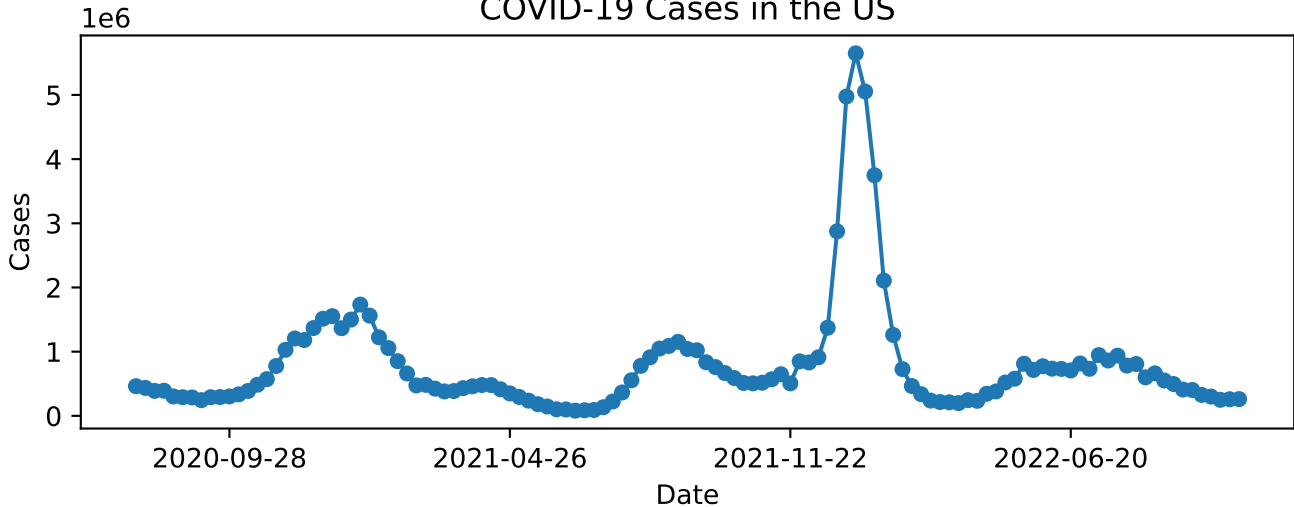

Supplement: supplementary_material [file attachment]

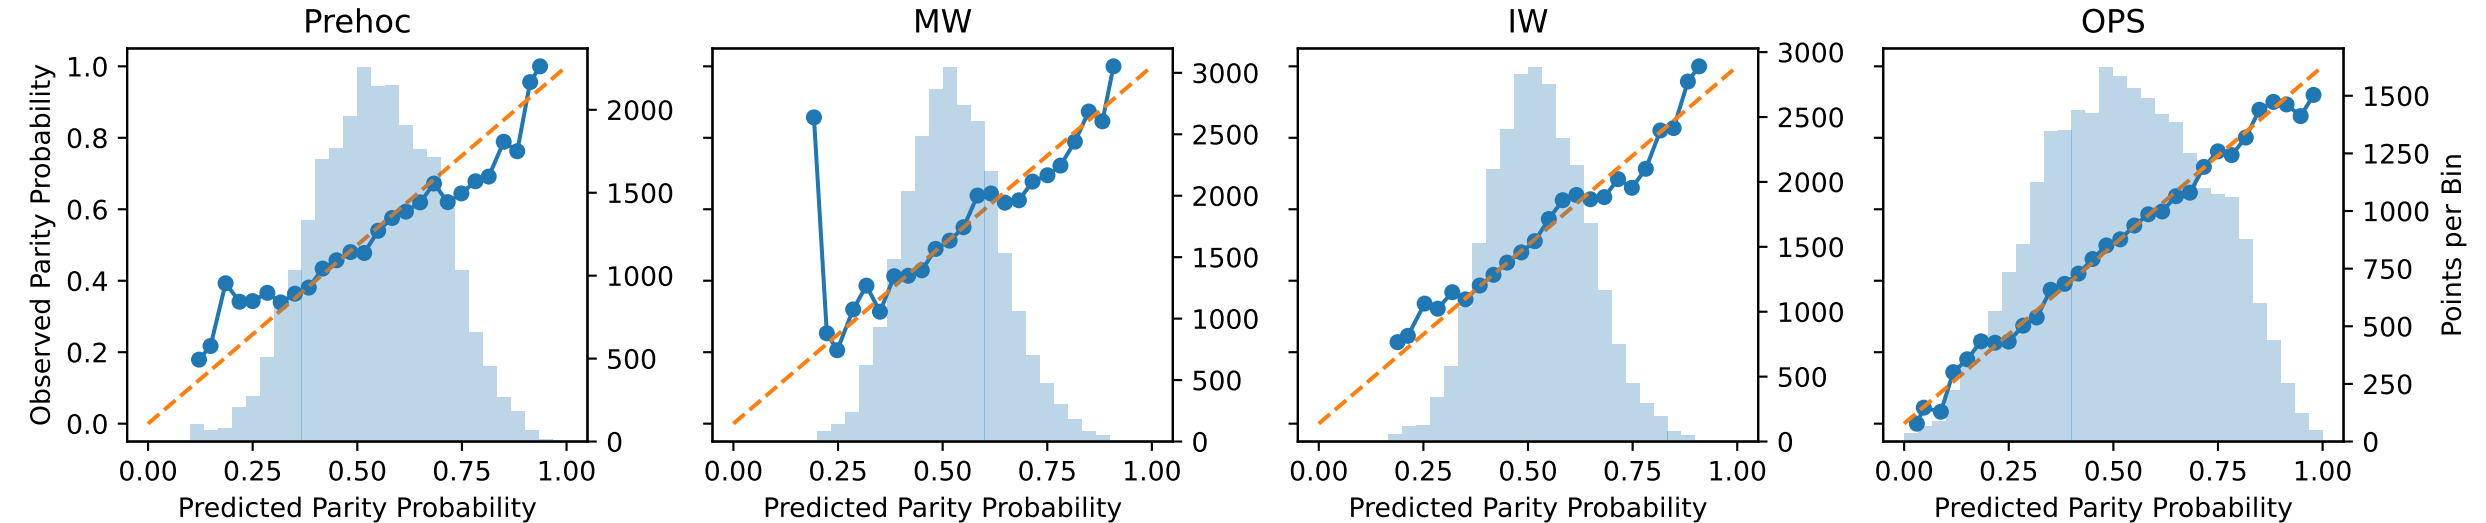

Supplement: supplementary_material [file attachment]

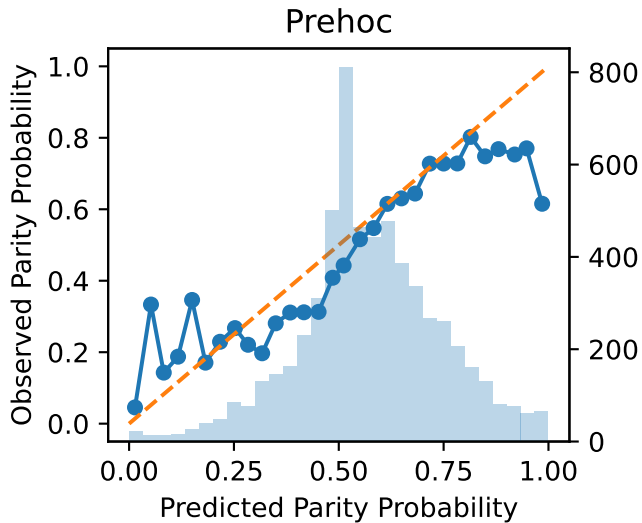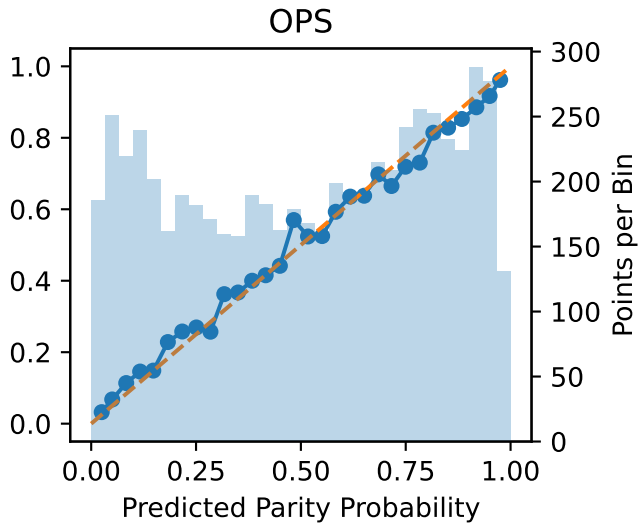

Supplement: supplementary_material [file attachment]

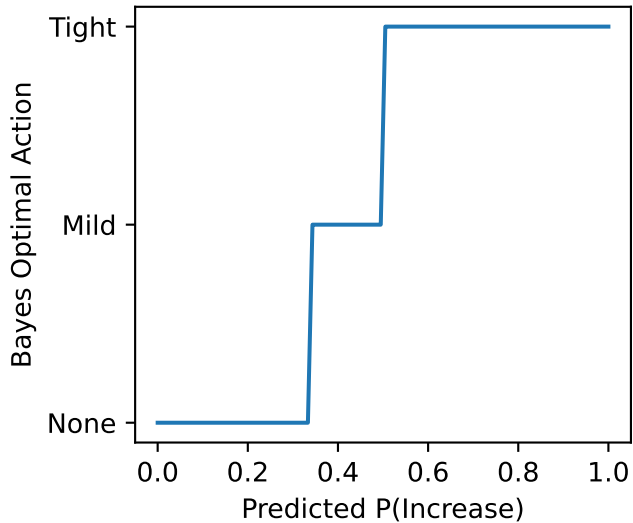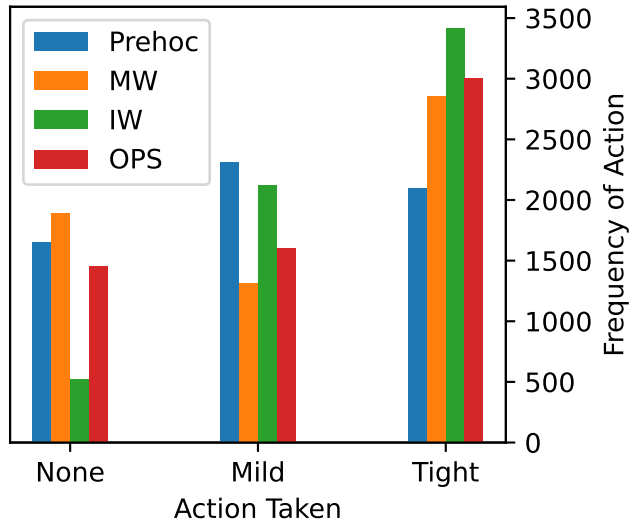

Supplement: supplementary_material [file attachment]

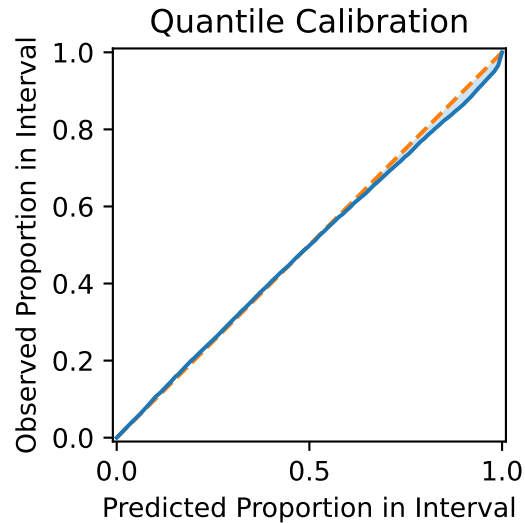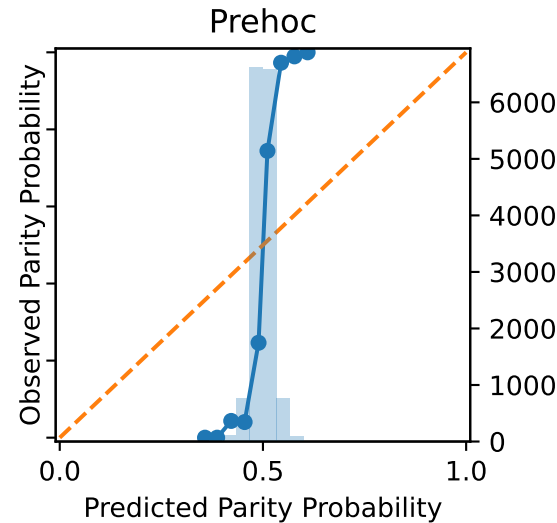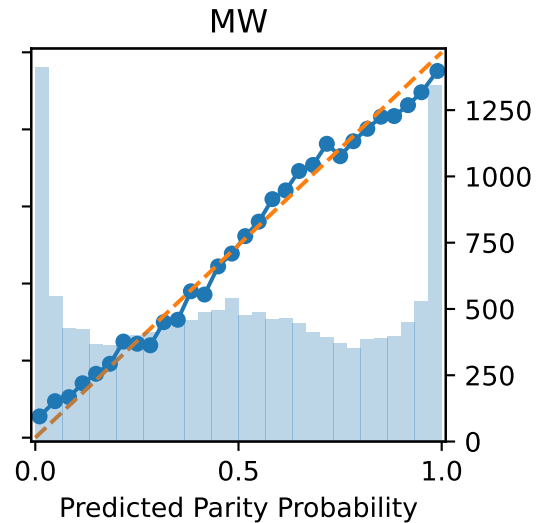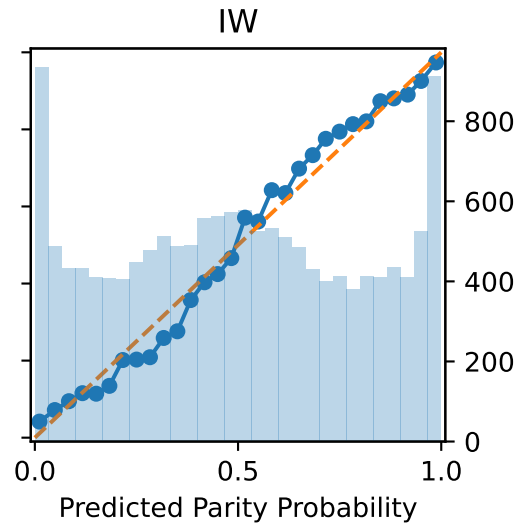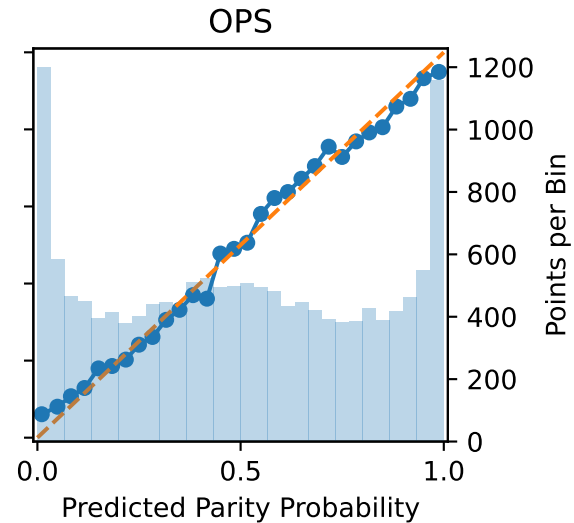

Supplement: supplementary_material [file attachment]

Prehoc

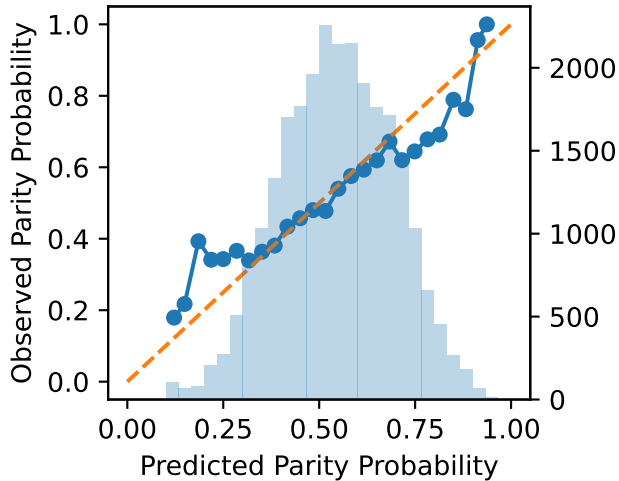

OPS

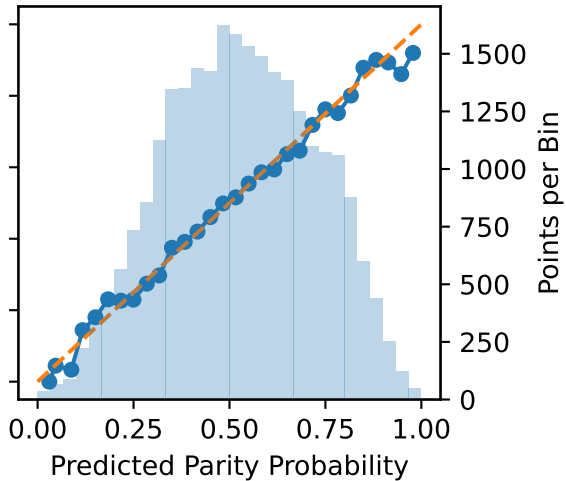

Supplement: supplementary_material [file attachment]

BetaN State Transitions

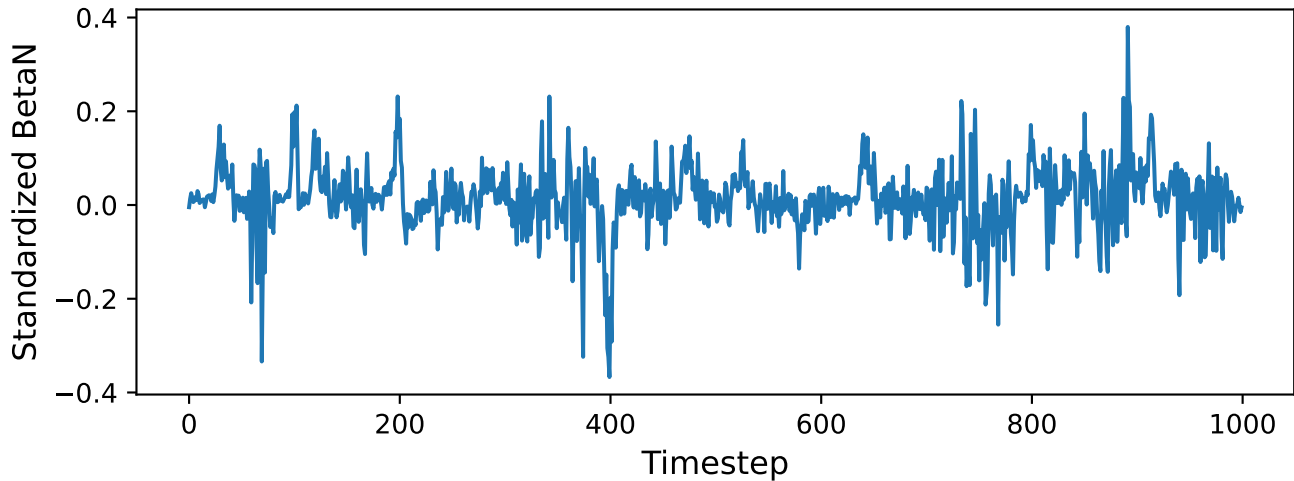

Supplement: supplementary_material [file attachment]

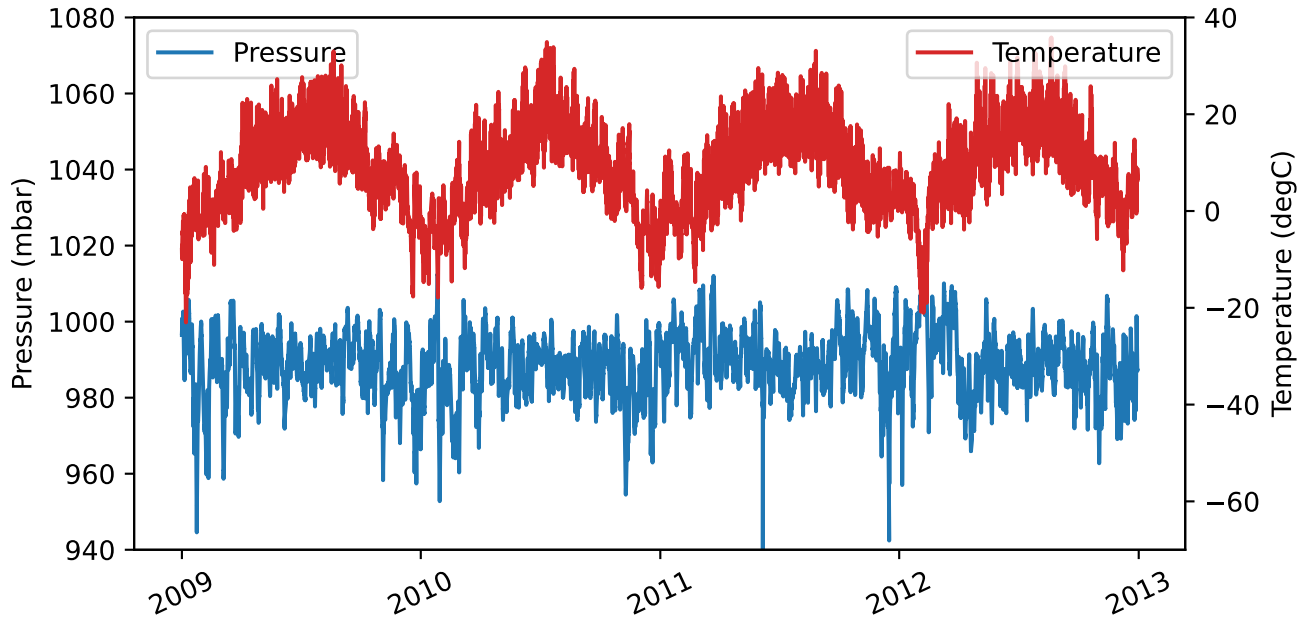

Supplement: supplementary_material [file attachment]

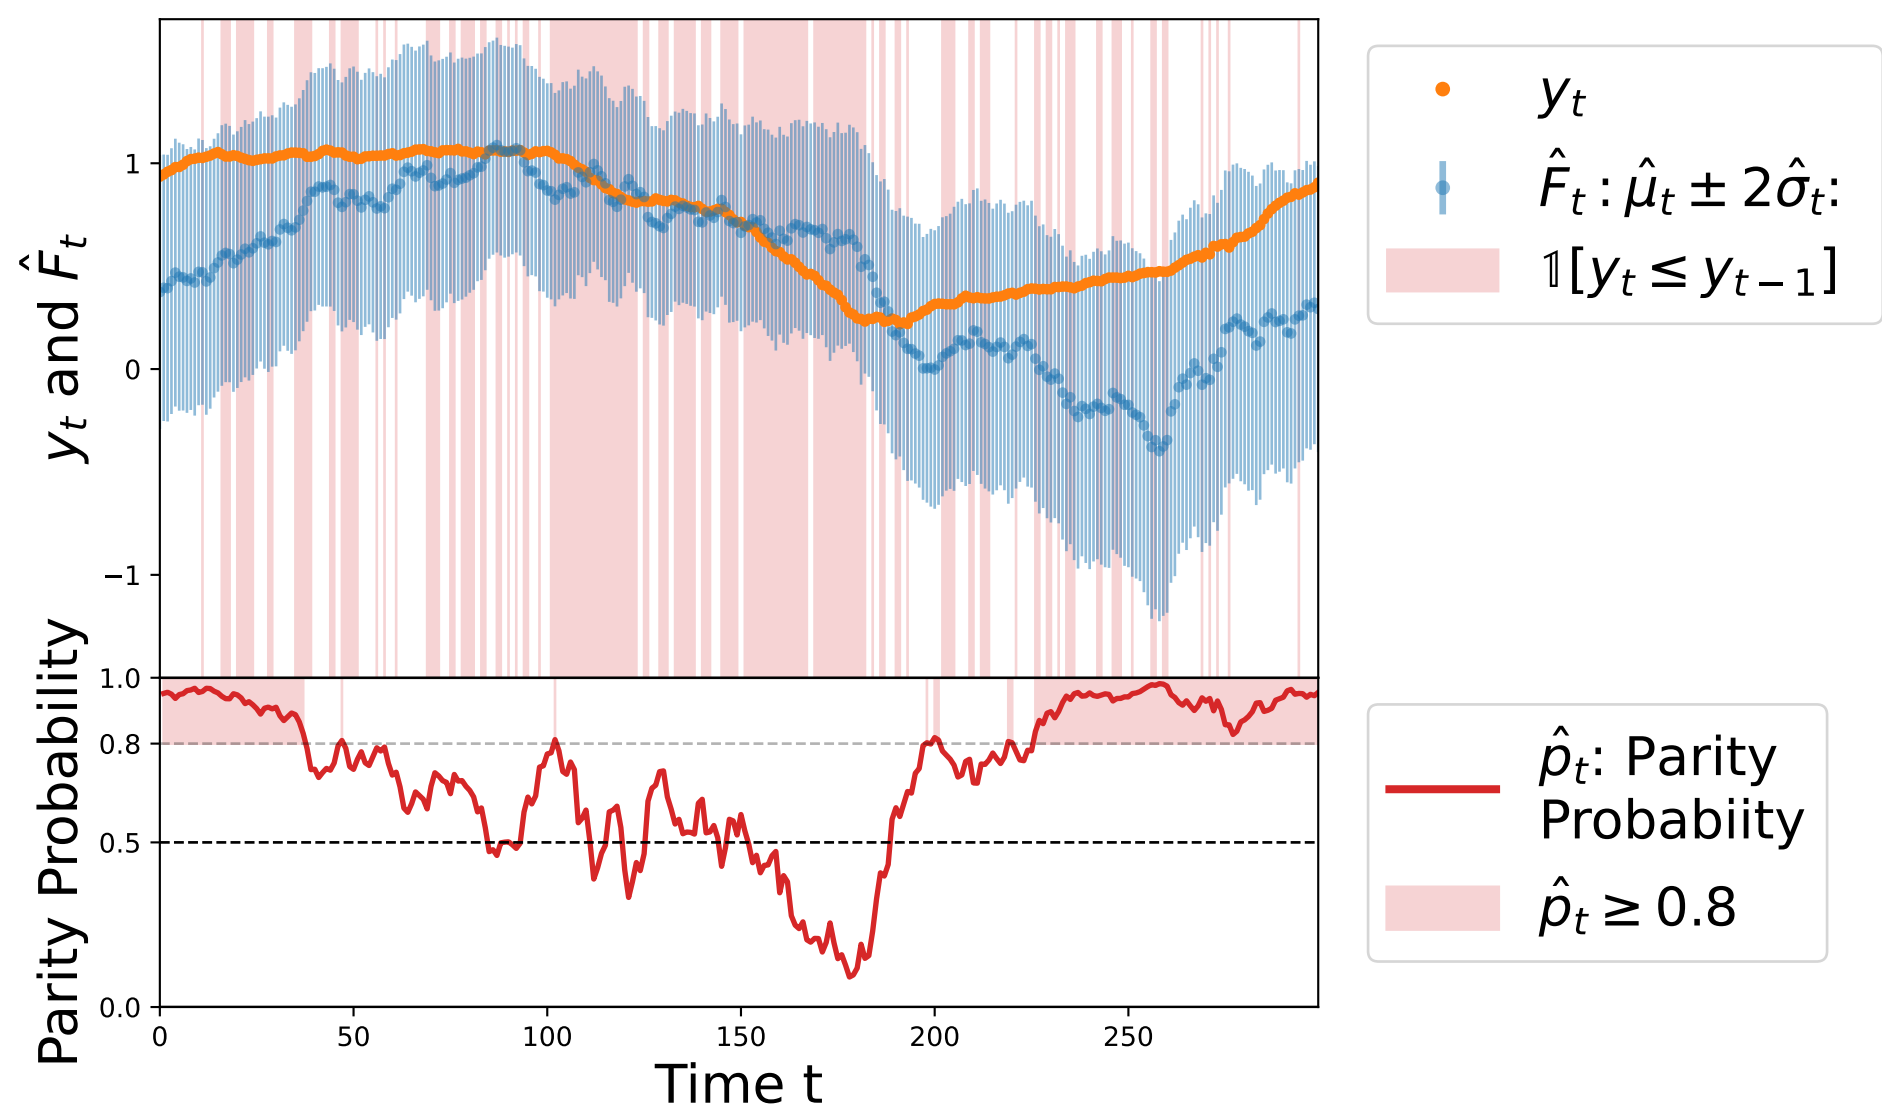

Supplement: supplementary_material [file attachment]
